# Supplementary material
Source: Springer Nature journal article supplement (https://www.springermedizin.de/resource/supplementary/12913_2013_3188_MOESM5_ESM.pdf/9532640)
Supplement: MOESM5 [file 9532640]

**RCT:**  
1600 invitations send to general practices  
  
30 practices, 900 patients randomized into:  
1). Intervention group  
2) Control group

**HEALTH PROFESSIONALS**

Start of RCT -> practice visit  
Practice consultant distributes network questionnaires to health professionals  
  
During practice visit, patients are selected for participation in the RCT

**HPs-ALTERS**

Contacted by TICD research team using contact details as provided by health professionals

**PATIENTS**

Receive questionnaire-booklet of RCT including question if they are willing to participate in the social network research.

Invitations in first six practices:  
1) Complete additional questions by phone  
2) Complete additional questions by phone OR by paper-based questionnaire

Invitations in following practices:  
1) Complete additional questions by paper-based questionnaire  
2) Complete additional questions by phone OR by paper-based questionnaire

**Group 1:**  
Network measures According to invitation

**Group 2:**  
Network measures According to patient preferences

**PATIENTS-ALTERS**

Contacted by patients themselves

**After six months:**  
Follow up measurements for RCT & repeated measurements of networks for health professionals and patients
